# Supplementary material
Source: publisher figshare collection journal article supplement (https://adisjournals.figshare.com/ndownloader/files/34492382)
Supplement: Supplementary file 1 [file 34492382]

## Baricitinib: Adis Evaluation

### Clinical Considerations

- Convenient once daily oral formulation
- Can be used with or without topical corticosteroids (TCS) [or topical calcineurin inhibitors for sensitive areas]
- Provides early and sustained improvements in multiple measures of disease severity, pruritus, skin pain, sleep disturbance and health-related quality of life
- Safety profile consistent with that established in patients with moderate to severe rheumatoid arthritis

### Plain Language Summary

#### *Background and rationale*

- A better understanding of the multiple factors that cause atopic dermatitis (AD; a chronic, relapsing, inflammatory skin disease often known as eczema) has led to the development of novel therapies that target various inflammatory pathways involved in the disease process
- Baricitinib (Olmiant®), a Janus kinase (JAK)1 and JAK2 inhibitor that targets inflammatory pathways in AD, is a once-daily oral treatment approved in the EU for moderate to severe AD in adults who are candidates for systemic therapy

#### *Clinical findings*

- In such patients, baricitinib, alone or in combination with topical corticosteroids, improved disease severity, pruritus, skin pain, sleep disturbance and health-related quality of life compared with placebo over 16 weeks
- Benefit onset was rapid and generally sustained over the longer term (treatment duration  $\leq$  68 weeks)
- The safety profile of baricitinib in patients with moderate to severe AD is consistent with that seen in adults with moderate to severe rheumatoid arthritis treated with the drug

#### *Conclusion*

Baricitinib provides a convenient oral alternative to subcutaneous biologics for the treatment of moderate to severe AD

This plain language summary represents the opinions of the author. For a full list of declarations, including funding and author disclosure statements, please see the full text online. © Springer Nature Switzerland AG 2022.
